# Supplementary material for: Tunable and sizable band gap in silicene by surface adsorption
Source: PubMed Central journal article supplement — Sci Rep. 2012 Nov 14;2:853. doi: 10.1038/srep00853 (PMC3497012; doi:10.1038/srep00853), 2012-11-14
Supplement: srep00853-s1.pdf [file srep00853-s1.pdf]

## Supplementary material

# Tunable and sizable band gap in silicene by surface adsorption

Ruge Quhe,<sup>1,2</sup> Ruixiang Fei,<sup>1</sup> Qihang Liu,<sup>1</sup> Jiaxin Zheng,<sup>1,2</sup> Hong Li,<sup>1</sup> Chengyong Xu,<sup>1</sup> Zeyuan Ni,<sup>1</sup> Yangyang Wang,<sup>1</sup> Dapeng Yu,<sup>1</sup> Zhengxiang Gao,<sup>1</sup> and Jing Lu<sup>1,\*</sup>

<sup>1</sup>State Key Laboratory of Mesoscopic Physics and Department of Physics,  
Peking University, Beijing 100871, P. R. China

<sup>2</sup>Academy for Advanced Interdisciplinary Studies, Peking University, Beijing 100871,  
P. R. China

\*Corresponding author: jinglu@pku.edu.cn

## Methods

The spin-orbital coupling (SOC) effects are investigated by using the plane wave (PW) basis set and the projector-augmented wave (PAW) pseudopotential implemented in the VASP package.<sup>1</sup> Generalized gradient approximation (GGA) of the Perdew-Burke-Ernzerhof (PBE) form is employed for the exchange-correlation functional.<sup>2</sup> A PW energy cutoff of 500 eV and a  $45 \times 45 \times 1$  Monkhorst-Pack  $k$ -mesh<sup>3</sup> are used to generate the charge densities.

The quasiparticle calculations are carried out using the ABINIT package.<sup>4</sup> First, we compute the wave functions using DFT. The local density approximation (LDA) of the Ceperley-Alder form is employed for the exchange-correlation functional.<sup>5</sup> A PW energy cutoff of 500 eV is used, together with the norm-conserving pseudopotentials,<sup>6</sup> and the Brillouin zone is sampled with an  $18 \times 18 \times 1$  Monkhorst-Pack grid.<sup>3</sup> Second, the quasiparticle energies  $E_{nk}$  are calculated using the following quasiparticle Schrödinger equation, which uses the self-energy  $\Sigma$  acquired from the  $GW$  approximation.<sup>7</sup>

$$\left[-\frac{\nabla^2}{2} + V_{\text{ion}} + V_{\text{Hartree}} + \Sigma(E_{nk})\right]\Psi_{nk} = E_{nk}\Psi_{nk} \quad (1)$$

Therein, the Green function and the Coulomb screening are constructed from the LDA results in the first step, and the plasmon-pole model is used for the screening computation. We perform the  $GW$  calculation in a nonself-consistent way.

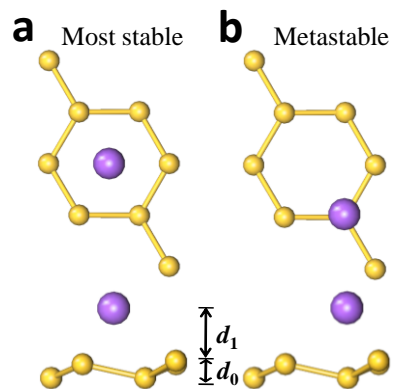

**Figure S1: Possible configurations of AMSi<sub>8</sub> monolayer.** The AM atom is above the hexagon center in the most stable state of AMSi<sub>8</sub> monolayer and above one of the lower Si atom in the metastable state.

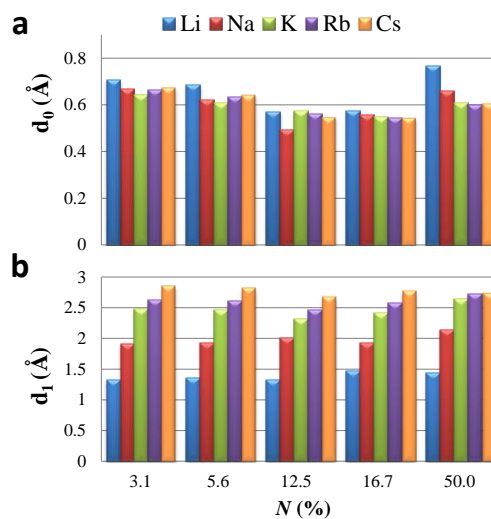

**Figure S2: Dependences of the silicene buckling  $d_0$  and the distance between the AM atom and silicene  $d_1$  on the AM coverage.**  $d_0$  of the pure silicene is 0.46 Å.

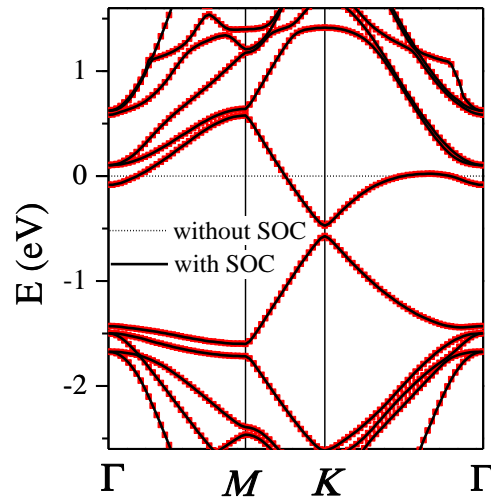

**Figure S3: Band structures of NaSi<sub>8</sub> monolayer with and without the inclusion of the SOC effects.** In order to keep consistency and obtain a reliable compared result, all the above band structures are calculated by using the PW basis set implemented in the VASP package. The band gap of NaSi<sub>8</sub> monolayer with the inclusion of the SOC effects is 0.1 eV, which is only 1.2 meV larger than the one without the inclusion of the SOC effects.

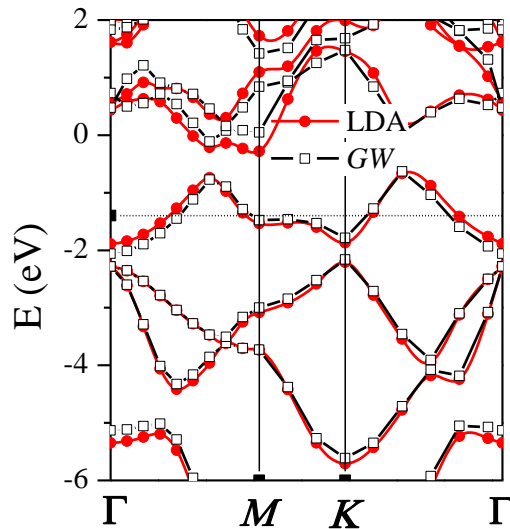

**Figure S4: Band structures of NaSi<sub>2</sub> monolayer at the LDA and GW levels.** For the sake of comparison, both the band structures are calculated by using the PW basis set implemented in the ABINIT package.

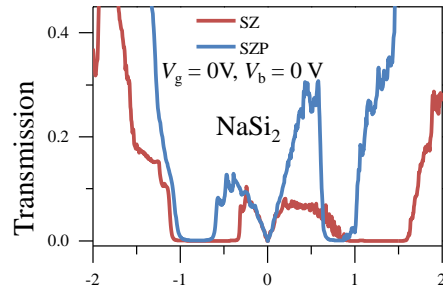

**Figure S5: Transmission spectrum of the Na-covered silicene FET with  $N = 50\%$ .** The channel is  $113.8 \text{ \AA}$  long. A smaller transport gap is obtained in the transmission spectrum by using the SZP basis set compared with the SZ basis set. Both  $V_g$  and  $V_b$  are set to zero.

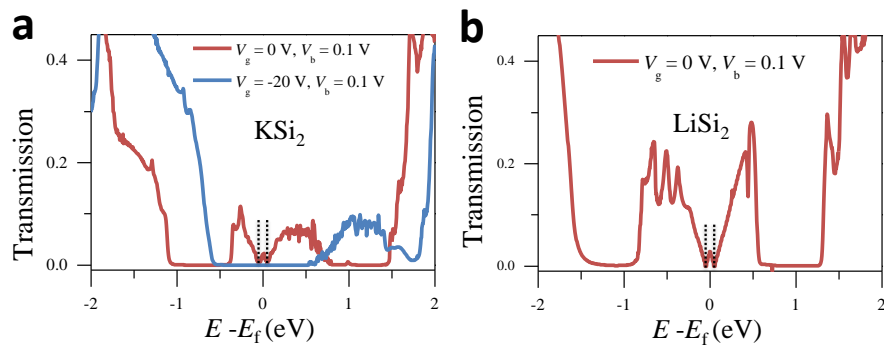

**Figure S6: Transmission spectra of the AM-covered silicene FET.** The channel is composed of (a) K-covered or (b) Li-covered silicene with  $N = 50.0\%$ . The channel is  $113.8 \text{ \AA}$  long. The SZ basis set is used. The vertical dashed-line indicates the bias window.

## References

1. Kresse, G. & Joubert, D. From ultrasoft pseudopotentials to the projector augmented-wave method. *Phys. Rev. B* **59**, 1758-1775 (1999).
2. Perdew, J. P., Burke, K. & Ernzerhof, M. Generalized gradient approximation made simple. *Phys. Rev. Lett.* **77**, 3865-3868 (1996).
3. Monkhorst, H. J. & Pack, J. D. Special points for brillouin-zone integrations. *Phys. Rev. B* **13**, 5188-5192 (1976).
4. Bruneval, F. & Gonze, X. Accurate *GW* self-energies in a plane-wave basis using only a few empty states: Towards large systems. *Phys. Rev. B* **78**, 085125 (2008).
5. Ceperley, D. M. & Alder, B. J. Ground state of the electron gas by a stochastic method. *Phys. Rev. Lett.* **45**, 566-569 (1980).
6. Hamann, D. R., Schlüter, M. & Chiang, C. Norm-conserving pseudopotentials. *Phys. Rev. Lett.* **43**, 1494-1497 (1979).
7. Onida, G., Reining, L. & Rubio, A. Electronic excitations: Density-functional versus many-body Green's-function approaches. *Rev. Mod. Phys.* **74**, 601-659 (2002).
